# Supplementary material for: Orientation-tuning in self-assembled heterostructures induced by a buffer layer
Source: Royal Society of Chemistry journal article supplement (doi:10.1039/c3nr06664a), 2014-01-01
Supplement: c3nr06664a1.pdf [file c3nr06664a1.pdf]

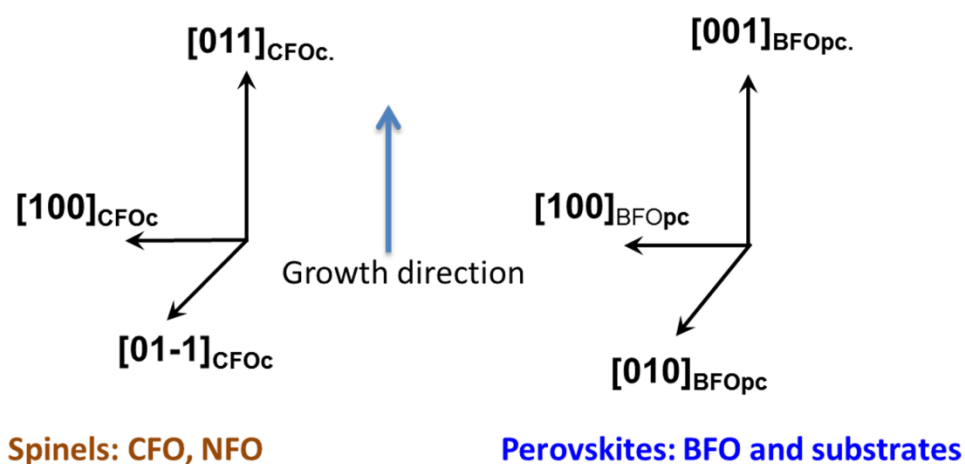

Fig. s1 A schematic of 3-d relationships in the perovskite-spinel systems.

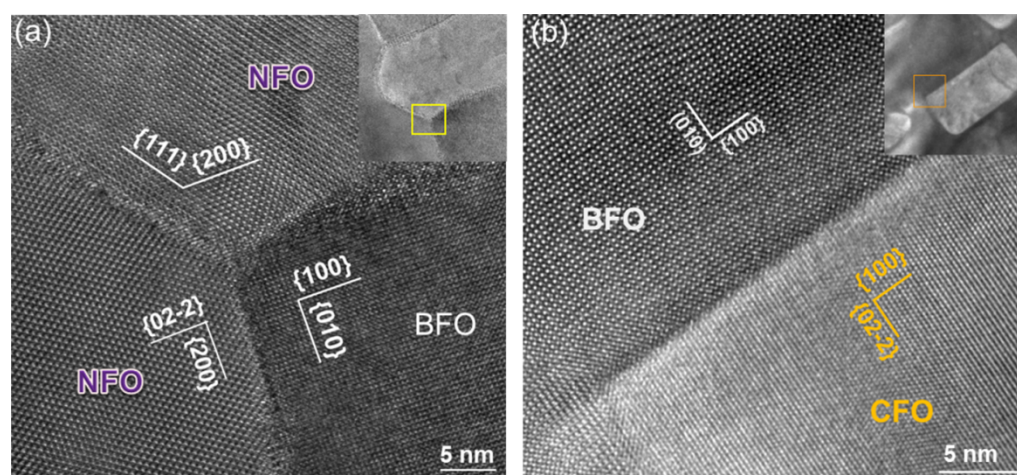

Fig.s2 Plan-view hrtem from bfo[001] and [011]nfo/cfo directions.

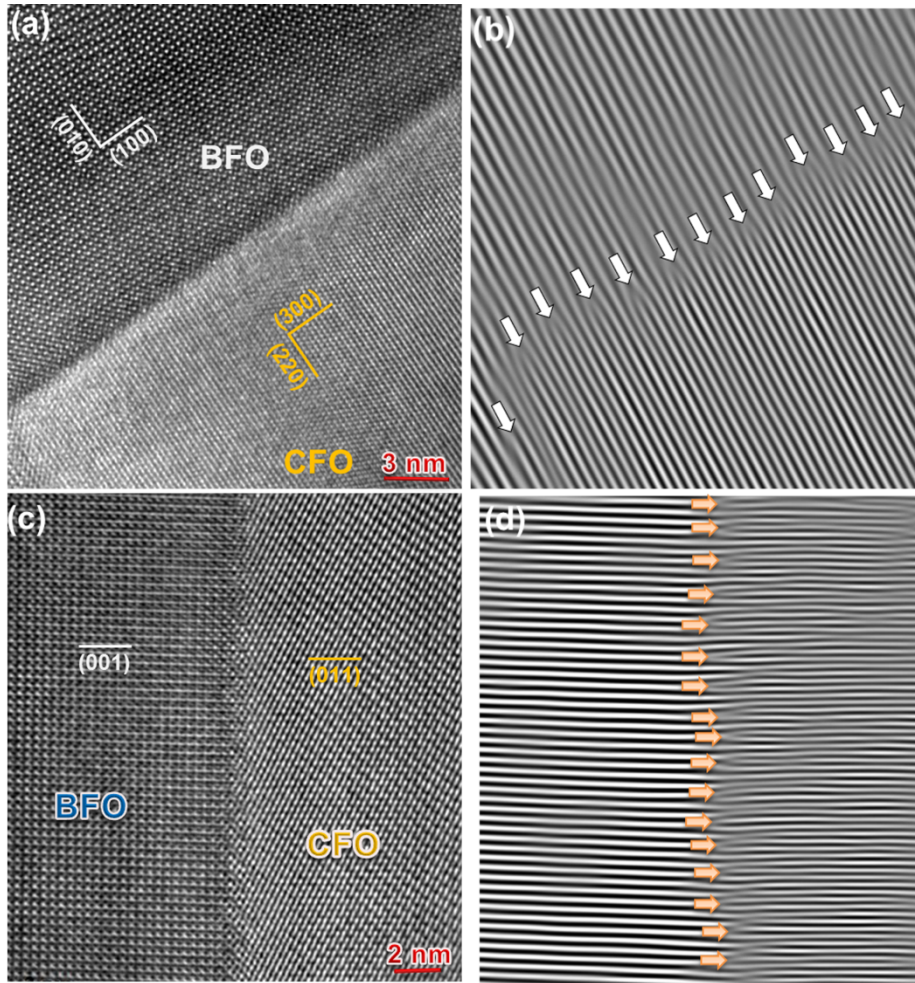

Fig. s3 The bfo-cfo interfaces with one-dimensional fft filtered images, (a) and (b) plane-view, (c) and (d) cross-section.
